# Supplementary material for: A comparison of the low temperature transcriptomes and CBF regulons of three plant species that differ in freezing tolerance: Solanum commersonii, Solanum tuberosum, and Arabidopsis thaliana
Source: PubMed Central journal article supplement — J Exp Bot. 2011 Apr 21;62(11):3807–19. doi: 10.1093/jxb/err066 (PMC3134341; doi:10.1093/jxb/err066), 2011-04-21
Supplement: supp_err066_00057158-file002.pdf [file supp_err066_00057158-file002.pdf]

**Table S1.** Primers used in qRT-PCR

| Name     | Sequence                     | Target                    |
|----------|------------------------------|---------------------------|
| CL_RT_15 | GGCCTTGATAATCCCTGATGAATAAG   | At Ubiquitin 10           |
| CL_RT_16 | AAAGAGATAACAGGAACGGAAACATAGT | At Ubiquitin 10           |
| MC_122   | TGCCATAAACCCCTTTTTGT         | St 60S (clone STMCK67)    |
| MC_123   | AACAATGGCGGCTAAGAAGA         | St 60S (clone STMCK67)    |
| MC_132   | TGGGCTCATAATCTCGAATC         | St CAF1a (clone STMDD59)  |
| MC_133   | GCTTGAAAACAACACCAGGAA        | St CAF1a (clone STMDD59)  |
| MC_201   | GATCAGATCGAAACGACCTCGTA      | St ZAT10 (PUT32825/45213) |
| MC_202   | ATCTTCGGAAATAATTGGTTGTTGT    | St ZAT10 (PUT32825/45213) |
| MC_203   | TGCGCGTGACTTTGACCTAA         | St ZAT10 (PUT22122/22120) |
| MC_204   | AGTCAATGGTCAGATCCAATTGG      | St ZAT10 (PUT22122/22120) |
| MC_205   | GGTCCGAGGTCGATCTGGTA         | St Myb73 (PUT69025)       |
| MC_206   | AAGCACGTATGCTCCACTTGAG       | St Myb73 (PUT69025)       |
| MC_207   | CCCACCACAATTATTCAAACGA       | St ZAT12 (PUT68089)       |
| MC_208   | GAAGGTGCTAGTAGTGGTGAATTGG    | St ZAT12 (PUT68089)       |
| MC_212   | GCTTGATGCTTCTGCTGATGTG       | St CZF1 (PUT12601)        |
| MC_213   | AGATCAGGTCAACAGCTCGTTTC      | St CZF1 (PUT12601)        |
| MC_214   | TCACCCACCTGCATTACAG          | St CZF1 (PUT25814/25815)  |
| MC_215   | CCCGAGCGTTTAGAGATGTCTT       | St CZF1 (PUT25814/25815)  |
| MC_216   | TTAGTCTGGAAAATGACTTGTGATTCA  | St CDF3 (clone STM CY67)  |
| MC_217   | GAGACGACCACCGGAAGTATCT       | St CDF3 (clone STM CY67)  |
| MC_323   | GGTTTGGTTAGGCACATTTAACG      | St RAV1 (PUT3404/3405)    |
| MC_324   | GGCCGCGACGTCGTAA             | St RAV1 (PUT3404/3405)    |
| SJG_80   | TTCCGTCCGTACAGTGGAAAT        | At CBF3                   |
| SJG_81   | AACTCCATAACGATACGTCGTC       | At CBF3                   |

At – *Arabidopsis thaliana*; St – *Solanum tuberosum*

**Table S2.** Affymetrix cel files used to identify *A. thaliana* cold-regulated genes

| Array Name                        | Reference            |
|-----------------------------------|----------------------|
| COLD_12H_ROOT_REP1.cel            | Kilian et al. (2007) |
| COLD_12H_ROOT_REP2.cel            | Kilian et al. (2007) |
| COLD_12H_SHOOT_REP1.cel           | Kilian et al. (2007) |
| COLD_12H_SHOOT_REP2.cel           | Kilian et al. (2007) |
| COLD_1H_ROOT_REP1.cel             | Kilian et al. (2007) |
| COLD_1H_ROOT_REP2.cel             | Kilian et al. (2007) |
| COLD_1H_SHOOT_REP1.cel            | Kilian et al. (2007) |
| COLD_1H_SHOOT_REP2.cel            | Kilian et al. (2007) |
| COLD_24H_ROOT_REP1.cel            | Kilian et al. (2007) |
| COLD_24H_ROOT_REP2.cel            | Kilian et al. (2007) |
| COLD_24H_SHOOT_REP1.cel           | Kilian et al. (2007) |
| COLD_24H_SHOOT_REP2.cel           | Kilian et al. (2007) |
| COLD_30MIN_ROOT_REP1.cel          | Kilian et al. (2007) |
| COLD_30MIN_ROOT_REP2.cel          | Kilian et al. (2007) |
| COLD_30MIN_SHOOT_REP1.cel         | Kilian et al. (2007) |
| COLD_30MIN_SHOOT_REP2.cel         | Kilian et al. (2007) |
| COLD_3H_ROOT_REP1.cel             | Kilian et al. (2007) |
| COLD_3H_ROOT_REP2.cel             | Kilian et al. (2007) |
| COLD_3H_SHOOT_REP1.cel            | Kilian et al. (2007) |
| COLD_3H_SHOOT_REP2.ce             | Kilian et al. (2007) |
| COLD_6H_ROOT_REP1.cel             | Kilian et al. (2007) |
| COLD_6H_ROOT_REP2.cel             | Kilian et al. (2007) |
| COLD_6H_SHOOT_REP1.cel            | Kilian et al. (2007) |
| COLD_6H_SHOOT_REP2.cel            | Kilian et al. (2007) |
| COLD_CONTROL_0MIN_ROOT_REP1.cel   | Kilian et al. (2007) |
| COLD_CONTROL_0MIN_ROOT_REP2.cel   | Kilian et al. (2007) |
| COLD_CONTROL_0MIN_SHOOT_REP1.cel  | Kilian et al. (2007) |
| COLD_CONTROL_0MIN_SHOOT_REP2.cel  | Kilian et al. (2007) |
| COLD_CONTROL_12H_ROOT_REP1.cel    | Kilian et al. (2007) |
| COLD_CONTROL_12H_ROOT_REP2.cel    | Kilian et al. (2007) |
| COLD_CONTROL_12H_SHOOT_REP1.cel   | Kilian et al. (2007) |
| COLD_CONTROL_12H_SHOOT_REP2.cel   | Kilian et al. (2007) |
| COLD_CONTROL_1H_ROOT_REP1.cel     | Kilian et al. (2007) |
| COLD_CONTROL_1H_ROOT_REP2.cel     | Kilian et al. (2007) |
| COLD_CONTROL_1H_SHOOT_REP1.cel    | Kilian et al. (2007) |
| COLD_CONTROL_1H_SHOOT_REP2.cel    | Kilian et al. (2007) |
| COLD_CONTROL_24H_ROOT_REP1.cel    | Kilian et al. (2007) |
| COLD_CONTROL_24H_ROOT_REP2.cel    | Kilian et al. (2007) |
| COLD_CONTROL_24H_SHOOT_REP1.cel   | Kilian et al. (2007) |
| COLD_CONTROL_24H_SHOOT_REP2.cel   | Kilian et al. (2007) |
| COLD_CONTROL_30MIN_ROOT_REP1.cel  | Kilian et al. (2007) |
| COLD_CONTROL_30MIN_ROOT_REP2.cel  | Kilian et al. (2007) |
| COLD_CONTROL_30MIN_SHOOT_REP1.cel | Kilian et al. (2007) |
| COLD_CONTROL_30MIN_SHOOT_REP2.cel | Kilian et al. (2007) |
| COLD_CONTROL_3H_ROOT_REP1.cel     | Kilian et al. (2007) |
| COLD_CONTROL_3H_ROOT_REP2.cel     | Kilian et al. (2007) |

|                                |                      |
|--------------------------------|----------------------|
| COLD_CONTROL_3H_SHOOT_REP1.cel | Kilian et al. (2007) |
| COLD_CONTROL_3H_SHOOT_REP2.cel | Kilian et al. (2007) |
| COLD_CONTROL_6H_ROOT_REP1.cel  | Kilian et al. (2007) |
| COLD_CONTROL_6H_ROOT_REP2.cel  | Kilian et al. (2007) |
| COLD_CONTROL_6H_SHOOT_REP1.cel | Kilian et al. (2007) |
| COLD_CONTROL_6H_SHOOT_REP2.cel | Kilian et al. (2007) |
| MTE2A.cel                      | Vogel et al. (2005)  |
| MTE2B.cel                      | Vogel et al. (2005)  |
| MTWSA.cel                      | Vogel et al. (2005)  |
| MTWSB.cel                      | Vogel et al. (2005)  |
| MTWT0HAPLATE.cel               | Vogel et al. (2005)  |
| MTWT0HBPLATE.cel               | Vogel et al. (2005)  |
| MTWT1HAPLATE.cel               | Vogel et al. (2005)  |
| MTWT1HBPLATE.cel               | Vogel et al. (2005)  |
| MTWT24HAPLATE.cel              | Vogel et al. (2005)  |
| MTWT7DAPLATE.cel               | Vogel et al. (2005)  |
| MTWT7DBPLATE.cel               | Vogel et al. (2005)  |
| Col_0h_1273-MT.cel             | Unpublished          |
| Col_0h_943MT.cel               | Unpublished          |
| Col_24h_947MT.cel              | Unpublished          |
| Col_24h_948MT.cel              | Unpublished          |
| Col_24h_r4_1249-MT.cel         | Unpublished          |
| Col_24h_z3_1532-MT.cel         | Unpublished          |
| Col_2h_944MT.cel               | Unpublished          |
| Col_lc_8h_1051-MT.cel          | Unpublished          |
| Col_7d_1526-MT.cel             | Unpublished          |
| Cvi_24h_949MT.cel              | Unpublished          |
| Cvi_24h_950MT.cel              | Unpublished          |
| Cvi_24h_951MT.cel              | Unpublished          |
| DN93_7d_1546-MT.cel            | Unpublished          |
| DNx96_7d_1528-MT.cel           | Unpublished          |
| DN89_0h_1248-MT.cel            | Unpublished          |
| DN89_24h_1263-MT.cel           | Unpublished          |
| DN96_0h_1272-MT.cel            | Unpublished          |
| DN96_24h_1250-MT.cel           | Unpublished          |

---

**Table S3: *A. thaliana* cold-regulated genes**

| <b>Cold-induced genes</b> | <b>Cold-repressed genes</b> |
|---------------------------|-----------------------------|
| AT1G01420                 | AT1G01120                   |
| AT1G01470                 | AT1G01170                   |
| AT1G01500                 | AT1G01320                   |
| AT1G01650                 | AT1G01360                   |
| AT1G01940                 | AT1G01430                   |
| AT1G02270                 | AT1G01490                   |
| AT1G02310                 | AT1G01620                   |
| AT1G02330                 | AT1G01770                   |
| AT1G02340                 | AT1G02640                   |
| AT1G02370                 | AT1G02820                   |
| AT1G02400                 | AT1G03090                   |
| AT1G02460                 | AT1G03130                   |
| AT1G02660                 | AT1G03400                   |
| AT1G02820                 | AT1G03850                   |
| AT1G02870                 | AT1G03870                   |
| AT1G03360                 | AT1G04350                   |
| AT1G03530                 | AT1G05385                   |
| AT1G03905                 | AT1G05560                   |
| AT1G04240                 | AT1G06430                   |
| AT1G04870                 | AT1G06510                   |
| AT1G04945                 | AT1G06640                   |
| AT1G05000                 | AT1G07350                   |
| AT1G05170                 | AT1G07440                   |
| AT1G05575                 | AT1G08110                   |
| AT1G06000                 | AT1G09010                   |
| AT1G06380                 | AT1G09140                   |
| AT1G06720                 | AT1G09390                   |
| AT1G06780                 | AT1G09415                   |
| AT1G07070                 | AT1G09750                   |
| AT1G07360                 | AT1G10020                   |
| AT1G07420                 | AT1G10150                   |
| AT1G07430                 | AT1G10360                   |
| AT1G08410                 | AT1G10960                   |
| AT1G08500                 | AT1G10990                   |
| AT1G08580                 | AT1G11260                   |
| AT1G08610                 | AT1G11310                   |
| AT1G08920                 | AT1G11350                   |
| AT1G09070                 | AT1G11410                   |
| AT1G09240                 | AT1G11580                   |
| AT1G09350                 | AT1G11720                   |
| AT1G09780                 | AT1G12080                   |
| AT1G10090                 | AT1G12240                   |
| AT1G10270                 | AT1G12250                   |
| AT1G10370                 | AT1G12780                   |
| AT1G10410                 | AT1G13080                   |
| AT1G10490                 | AT1G13090                   |
| AT1G10760                 | AT1G13650                   |
| AT1G11170                 | AT1G13990                   |
| AT1G11210                 | AT1G14120                   |
| AT1G11390                 | AT1G14150                   |
| AT1G11960                 | AT1G14345                   |
| AT1G12370                 | AT1G14360                   |
| AT1G12710                 | AT1G14700                   |

|           |           |
|-----------|-----------|
| AT1G12845 | AT1G14900 |
| AT1G13030 | AT1G15180 |
| AT1G13160 | AT1G15260 |
| AT1G13260 | AT1G15290 |
| AT1G13560 | AT1G15400 |
| AT1G13740 | AT1G15740 |
| AT1G13870 | AT1G15960 |
| AT1G13930 | AT1G15980 |
| AT1G14060 | AT1G16080 |
| AT1G14530 | AT1G16260 |
| AT1G14580 | AT1G16720 |
| AT1G15420 | AT1G16780 |
| AT1G15440 | AT1G17140 |
| AT1G15550 | AT1G17200 |
| AT1G15870 | AT1G17340 |
| AT1G16280 | AT1G17360 |
| AT1G16850 | AT1G17700 |
| AT1G16860 | AT1G18170 |
| AT1G17170 | AT1G18570 |
| AT1G17180 | AT1G18590 |
| AT1G17665 | AT1G18620 |
| AT1G18360 | AT1G18650 |
| AT1G18740 | AT1G19000 |
| AT1G18850 | AT1G19150 |
| AT1G18870 | AT1G19530 |
| AT1G18900 | AT1G19670 |
| AT1G19050 | AT1G19770 |
| AT1G19180 | AT1G19835 |
| AT1G19370 | AT1G19960 |
| AT1G19960 | AT1G20560 |
| AT1G20030 | AT1G20640 |
| AT1G20100 | AT1G20850 |
| AT1G20440 | AT1G21250 |
| AT1G20450 | AT1G21270 |
| AT1G20693 | AT1G21350 |
| AT1G20696 | AT1G21500 |
| AT1G20920 | AT1G21560 |
| AT1G21010 | AT1G22335 |
| AT1G21050 | AT1G22360 |
| AT1G21460 | AT1G22400 |
| AT1G21540 | AT1G22430 |
| AT1G21670 | AT1G22890 |
| AT1G21790 | AT1G23020 |
| AT1G22270 | AT1G23030 |
| AT1G22570 | AT1G23205 |
| AT1G22770 | AT1G23310 |
| AT1G23100 | AT1G23390 |
| AT1G23140 | AT1G23400 |
| AT1G23710 | AT1G23480 |
| AT1G23800 | AT1G23740 |
| AT1G24310 | AT1G23860 |
| AT1G24575 | AT1G23870 |
| AT1G25250 | AT1G24100 |
| AT1G25260 | AT1G25230 |
| AT1G25370 | AT1G25275 |

|           |           |
|-----------|-----------|
| AT1G25400 | AT1G26150 |
| AT1G26340 | AT1G26560 |
| AT1G26450 | AT1G26670 |
| AT1G26790 | AT1G27210 |
| AT1G27200 | AT1G27290 |
| AT1G27630 | AT1G28330 |
| AT1G27730 | AT1G28400 |
| AT1G27760 | AT1G28580 |
| AT1G27910 | AT1G29260 |
| AT1G27920 | AT1G29440 |
| AT1G27930 | AT1G29500 |
| AT1G28050 | AT1G29510 |
| AT1G28060 | AT1G29530 |
| AT1G29310 | AT1G29660 |
| AT1G29395 | AT1G29700 |
| AT1G29940 | AT1G30260 |
| AT1G30240 | AT1G30520 |
| AT1G30360 | AT1G31170 |
| AT1G30620 | AT1G31320 |
| AT1G30960 | AT1G31550 |
| AT1G31280 | AT1G31580 |
| AT1G31660 | AT1G31650 |
| AT1G31850 | AT1G31820 |
| AT1G32440 | AT1G31920 |
| AT1G32860 | AT1G32070 |
| AT1G32870 | AT1G32080 |
| AT1G32920 | AT1G32100 |
| AT1G33230 | AT1G32460 |
| AT1G33960 | AT1G32700 |
| AT1G33970 | AT1G33240 |
| AT1G42440 | AT1G33780 |
| AT1G43620 | AT1G33811 |
| AT1G43860 | AT1G34640 |
| AT1G43890 | AT1G35340 |
| AT1G47710 | AT1G35350 |
| AT1G48100 | AT1G35710 |
| AT1G48370 | AT1G43790 |
| AT1G48570 | AT1G43800 |
| AT1G48920 | AT1G44000 |
| AT1G49200 | AT1G44770 |
| AT1G49450 | AT1G47128 |
| AT1G49560 | AT1G47400 |
| AT1G49570 | AT1G47960 |
| AT1G49720 | AT1G48030 |
| AT1G51090 | AT1G48300 |
| AT1G51380 | AT1G48320 |
| AT1G51610 | AT1G48430 |
| AT1G51700 | AT1G48480 |
| AT1G52280 | AT1G48600 |
| AT1G52690 | AT1G49010 |
| AT1G52890 | AT1G49200 |
| AT1G52930 | AT1G49480 |
| AT1G53035 | AT1G49500 |
| AT1G53200 | AT1G49730 |
| AT1G53500 | AT1G49740 |

|           |           |
|-----------|-----------|
| AT1G53590 | AT1G49750 |
| AT1G53645 | AT1G49975 |
| AT1G54270 | AT1G50250 |
| AT1G54310 | AT1G51110 |
| AT1G54570 | AT1G51360 |
| AT1G54770 | AT1G51400 |
| AT1G54830 | AT1G51680 |
| AT1G55170 | AT1G52000 |
| AT1G55500 | AT1G52060 |
| AT1G55690 | AT1G52190 |
| AT1G55820 | AT1G52290 |
| AT1G55900 | AT1G52340 |
| AT1G56110 | AT1G52720 |
| AT1G56170 | AT1G53160 |
| AT1G56300 | AT1G53390 |
| AT1G56650 | AT1G53520 |
| AT1G58360 | AT1G53560 |
| AT1G59600 | AT1G53650 |
| AT1G59990 | AT1G53730 |
| AT1G60190 | AT1G54040 |
| AT1G60470 | AT1G54390 |
| AT1G60850 | AT1G54730 |
| AT1G60890 | AT1G54740 |
| AT1G61380 | AT1G54820 |
| AT1G61580 | AT1G55000 |
| AT1G61640 | AT1G55310 |
| AT1G61730 | AT1G55330 |
| AT1G61800 | AT1G55360 |
| AT1G61890 | AT1G55450 |
| AT1G62570 | AT1G55850 |
| AT1G62710 | AT1G55960 |
| AT1G62730 | AT1G56220 |
| AT1G62740 | AT1G56280 |
| AT1G63160 | AT1G56500 |
| AT1G63780 | AT1G56700 |
| AT1G63810 | AT1G56720 |
| AT1G64600 | AT1G58030 |
| AT1G64890 | AT1G58110 |
| AT1G65390 | AT1G58180 |
| AT1G65500 | AT1G58370 |
| AT1G65690 | AT1G59580 |
| AT1G65700 | AT1G59960 |
| AT1G66390 | AT1G60010 |
| AT1G67120 | AT1G60440 |
| AT1G67300 | AT1G60550 |
| AT1G67310 | AT1G60600 |
| AT1G67360 | AT1G60800 |
| AT1G67370 | AT1G61100 |
| AT1G67850 | AT1G61350 |
| AT1G67970 | AT1G62200 |
| AT1G68470 | AT1G62250 |
| AT1G68500 | AT1G62480 |
| AT1G68550 | AT1G62510 |
| AT1G68570 | AT1G62660 |
| AT1G68650 | AT1G62800 |

|           |           |
|-----------|-----------|
| AT1G68990 | AT1G63090 |
| AT1G69070 | AT1G63180 |
| AT1G69250 | AT1G63260 |
| AT1G69260 | AT1G63800 |
| AT1G69270 | AT1G64200 |
| AT1G69295 | AT1G64400 |
| AT1G69480 | AT1G64590 |
| AT1G69870 | AT1G64670 |
| AT1G69950 | AT1G64720 |
| AT1G70420 | AT1G64780 |
| AT1G70900 | AT1G64850 |
| AT1G71710 | AT1G65070 |
| AT1G71750 | AT1G65230 |
| AT1G71850 | AT1G65660 |
| AT1G71950 | AT1G66230 |
| AT1G72320 | AT1G66820 |
| AT1G72440 | AT1G66840 |
| AT1G72730 | AT1G66970 |
| AT1G72940 | AT1G67080 |
| AT1G73480 | AT1G67480 |
| AT1G73500 | AT1G67750 |
| AT1G73540 | AT1G67830 |
| AT1G73630 | AT1G67870 |
| AT1G73700 | AT1G67910 |
| AT1G73800 | AT1G68010 |
| AT1G73805 | AT1G68190 |
| AT1G74450 | AT1G68440 |
| AT1G74750 | AT1G68520 |
| AT1G74810 | AT1G68530 |
| AT1G74890 | AT1G68585 |
| AT1G75040 | AT1G68660 |
| AT1G75200 | AT1G68780 |
| AT1G75370 | AT1G68840 |
| AT1G75390 | AT1G69370 |
| AT1G75400 | AT1G69410 |
| AT1G75670 | AT1G69530 |
| AT1G75860 | AT1G69780 |
| AT1G75900 | AT1G70000 |
| AT1G76160 | AT1G70100 |
| AT1G76180 | AT1G70160 |
| AT1G76270 | AT1G70210 |
| AT1G76360 | AT1G70280 |
| AT1G76580 | AT1G70290 |
| AT1G76590 | AT1G70410 |
| AT1G76600 | AT1G70520 |
| AT1G76790 | AT1G70700 |
| AT1G76930 | AT1G70760 |
| AT1G77050 | AT1G70820 |
| AT1G77120 | AT1G70830 |
| AT1G77450 | AT1G70850 |
| AT1G77570 | AT1G71090 |
| AT1G77600 | AT1G71970 |
| AT1G77610 | AT1G72030 |
| AT1G77850 | AT1G72150 |
| AT1G78070 | AT1G72300 |



|           |           |
|-----------|-----------|
| AT1G78410 | AT1G72430 |
| AT1G78610 | AT1G72890 |
| AT1G78930 | AT1G72900 |
| AT1G79150 | AT1G72970 |
| AT1G79390 | AT1G73330 |
| AT1G79440 | AT1G73600 |
| AT1G79470 | AT1G73830 |
| AT1G79490 | AT1G74070 |
| AT1G79660 | AT1G74100 |
| AT1G80110 | AT1G74670 |
| AT1G80130 | AT1G74710 |
| AT1G80270 | AT1G75100 |
| AT1G80750 | AT1G75130 |
| AT1G80760 | AT1G75220 |
| AT2G02100 | AT1G75280 |
| AT2G02120 | AT1G75460 |
| AT2G03670 | AT1G76080 |
| AT2G03760 | AT1G76100 |
| AT2G03820 | AT1G76110 |
| AT2G04350 | AT1G76150 |
| AT2G04450 | AT1G76890 |
| AT2G04530 | AT1G76960 |
| AT2G11810 | AT1G76990 |
| AT2G12550 | AT1G77210 |
| AT2G14560 | AT1G77420 |
| AT2G14610 | AT1G77450 |
| AT2G14860 | AT1G77930 |
| AT2G15320 | AT1G77990 |
| AT2G15690 | AT1G78020 |
| AT2G15970 | AT1G78550 |
| AT2G16700 | AT1G78670 |
| AT2G16710 | AT1G78680 |
| AT2G16890 | AT1G79380 |
| AT2G16990 | AT1G79700 |
| AT2G17250 | AT1G79720 |
| AT2G17270 | AT1G80050 |
| AT2G17280 | AT1G80180 |
| AT2G17560 | AT1G80440 |
| AT2G17670 | AT1G80780 |
| AT2G17840 | AT1G80790 |
| AT2G17870 | AT1G80850 |
| AT2G18220 | AT1G80920 |
| AT2G18520 | AT1G80940 |
| AT2G18890 | AT2G01420 |
| AT2G18900 | AT2G01450 |
| AT2G19190 | AT2G01520 |
| AT2G19385 | AT2G01530 |
| AT2G19450 | AT2G01620 |
| AT2G19540 | AT2G01850 |
| AT2G19580 | AT2G01870 |
| AT2G19640 | AT2G01910 |
| AT2G19810 | AT2G02780 |
| AT2G19860 | AT2G03310 |
| AT2G20370 | AT2G03530 |
| AT2G20585 | AT2G03550 |

|           |           |
|-----------|-----------|
| AT2G21130 | AT2G03750 |
| AT2G21180 | AT2G04690 |
| AT2G21320 | AT2G04790 |
| AT2G21440 | AT2G05540 |
| AT2G21590 | AT2G14910 |
| AT2G21620 | AT2G15020 |
| AT2G21660 | AT2G15050 |
| AT2G22080 | AT2G15960 |
| AT2G22190 | AT2G16280 |
| AT2G22400 | AT2G16380 |
| AT2G22500 | AT2G17033 |
| AT2G22590 | AT2G17040 |
| AT2G22840 | AT2G17220 |
| AT2G22860 | AT2G17450 |
| AT2G23120 | AT2G17500 |
| AT2G23150 | AT2G17640 |
| AT2G23340 | AT2G17710 |
| AT2G23910 | AT2G18280 |
| AT2G24050 | AT2G18300 |
| AT2G24100 | AT2G18700 |
| AT2G24500 | At2g18840 |
| AT2G24590 | AT2G19310 |
| AT2G25355 | AT2G19590 |
| AT2G25530 | AT2G19800 |
| AT2G25620 | AT2G20180 |
| AT2G25625 | AT2G20725 |
| AT2G26200 | AT2G21210 |
| AT2G26400 | AT2G21650 |
| AT2G26530 | AT2G21950 |
| AT2G26810 | AT2G21970 |
| AT2G26830 | AT2G22090 |
| AT2G27200 | AT2G22330 |
| AT2G27830 | AT2G22420 |
| AT2G27840 | AT2G22980 |
| AT2G28400 | AT2G22990 |
| AT2G28550 | AT2G23130 |
| AT2G28600 | AT2G23200 |
| AT2G28720 | AT2G23390 |
| AT2G28790 | AT2G23780 |
| AT2G28900 | AT2G23840 |
| AT2G29090 | AT2G24150 |
| AT2G29210 | AT2G24220 |
| AT2G29540 | AT2G24280 |
| AT2G29760 | AT2G24550 |
| AT2G30040 | AT2G24600 |
| AT2G30350 | AT2G25080 |
| AT2G30640 | AT2G25200 |
| AT2G31010 | At2g25590 |
| AT2G31060 | AT2G25735 |
| AT2G31360 | AT2G25900 |
| AT2G31380 | AT2G26020 |
| AT2G31725 | AT2G26170 |
| AT2G31955 | AT2G26250 |
| AT2G31990 | AT2G26980 |
| AT2G32060 | AT2G27290 |

|           |           |
|-----------|-----------|
| AT2G32220 | AT2G27420 |
| AT2G32430 | AT2G28200 |
| AT2G33210 | AT2G28470 |
| AT2G33380 | AT2G28605 |
| AT2G33730 | AT2G28630 |
| AT2G34260 | AT2G28910 |
| AT2G34570 | AT2G28950 |
| AT2G34650 | AT2G29290 |
| AT2G34780 | AT2G29300 |
| AT2G34850 | AT2G29310 |
| AT2G34930 | AT2G29320 |
| AT2G35960 | AT2G29340 |
| AT2G36010 | AT2G29420 |
| AT2G36220 | AT2G29750 |
| AT2G36390 | AT2G30520 |
| AT2G36470 | AT2G31110 |
| AT2G36750 | AT2G31670 |
| AT2G36930 | AT2G31730 |
| AT2G37520 | AT2G31790 |
| AT2G37580 | AT2G31880 |
| AT2G37710 | AT2G32010 |
| AT2G37990 | AT2G32080 |
| AT2G38465 | AT2G32100 |
| AT2G38470 | AT2G32150 |
| AT2G38670 | AT2G32160 |
| AT2G38730 | AT2G32290 |
| AT2G39130 | AT2G32500 |
| AT2G39510 | AT2G32560 |
| AT2G39710 | AT2G32720 |
| AT2G39795 | AT2G33250 |
| AT2G39920 | AT2G33330 |
| AT2G40130 | AT2G33480 |
| AT2G40140 | AT2G34310 |
| AT2G40360 | AT2G34490 |
| AT2G40430 | AT2G34620 |
| AT2G40460 | AT2G35020 |
| AT2G40700 | AT2G35780 |
| AT2G40750 | AT2G35820 |
| AT2G40780 | AT2G36000 |
| AT2G40880 | AT2G36830 |
| AT2G40900 | AT2G36950 |
| AT2G41010 | AT2G37130 |
| AT2G41190 | AT2G37340 |
| AT2G41900 | AT2G37480 |
| AT2G42150 | AT2G37750 |
| AT2G42520 | AT2G37760 |
| AT2G42530 | AT2G37920 |
| AT2G42540 | AT2G38080 |
| AT2G43020 | AT2G38310 |
| AT2G43290 | AT2G38870 |
| AT2G43500 | AT2G39000 |
| AT2G43590 | AT2G39310 |
| AT2G43620 | AT2G39400 |
| AT2G43650 | AT2G39470 |
| AT2G44510 | AT2G39570 |

|           |           |
|-----------|-----------|
| AT2G44820 | AT2G39700 |
| AT2G44860 | AT2G39850 |
| AT2G44940 | AT2G39930 |
| AT2G45660 | AT2G40000 |
| AT2G45730 | AT2G40020 |
| AT2G46270 | AT2G40100 |
| AT2G46680 | AT2G40110 |
| AT2G46830 | AT2G40270 |
| AT2G47180 | AT2G40420 |
| AT2G47260 | AT2G40540 |
| AT2G47770 | AT2G40610 |
| AT2G47780 | AT2G40670 |
| AT2G47830 | AT2G40750 |
| AT2G47890 | AT2G41090 |
| AT2G47970 | AT2G41100 |
| AT2G47990 | AT2G41120 |
| AT3G01160 | AT2G41310 |
| AT3G01800 | AT2G42690 |
| AT3G01820 | AT2G42750 |
| AT3G02140 | AT2G42900 |
| AT3G02150 | AT2G43530 |
| AT3G02250 | AT2G43560 |
| AT3G02320 | AT2G43820 |
| AT3G02480 | AT2G44210 |
| AT3G02490 | AT2G44230 |
| AT3G02650 | AT2G44740 |
| AT3G02990 | AT2G45170 |
| AT3G03060 | AT2G45340 |
| AT3G03250 | AT2G45740 |
| AT3G03640 | AT2G45960 |
| AT3G03920 | AT2G46030 |
| AT3G04010 | AT2G46220 |
| AT3G04070 | AT2G46225 |
| AT3G04550 | AT2G46250 |
| AT3G04640 | AT2G46330 |
| AT3G05060 | AT2G46450 |
| AT3G05500 | AT2G46490 |
| AT3G05580 | AT2G46580 |
| AT3G05640 | AT2G46650 |
| AT3G05660 | AT2G46710 |
| AT3G05800 | AT2G47910 |
| AT3G05880 | AT2G47930 |
| AT3G05890 | AT3G01360 |
| AT3G05980 | AT3G01370 |
| AT3G06035 | AT3G01440 |
| AT3G06200 | AT3G01500 |
| AT3G06410 | AT3G01690 |
| AT3G06530 | AT3G01980 |
| AT3G06620 | AT3G02120 |
| AT3G06700 | AT3G02170 |
| AT3G07050 | AT3G02180 |
| AT3G07390 | AT3G02300 |
| AT3G07590 | AT3G02550 |
| AT3G07750 | AT3G02690 |
| AT3G08640 | AT3G02790 |

|           |           |
|-----------|-----------|
| AT3G08710 | AT3G02885 |
| AT3G08950 | AT3G04210 |
| AT3G09350 | AT3G04720 |
| AT3G09440 | AT3G05890 |
| AT3G09540 | AT3G06070 |
| AT3G09720 | AT3G06080 |
| AT3G10300 | AT3G06330 |
| AT3G10530 | AT3G06750 |
| AT3G10690 | AT3G06770 |
| AT3G11020 | AT3G06850 |
| AT3G11410 | AT3G07010 |
| AT3G11420 | AT3G07270 |
| AT3G11670 | AT3G07310 |
| AT3G11964 | AT3G07340 |
| AT3G12270 | AT3G07560 |
| AT3G12320 | AT3G08940 |
| AT3G12340 | AT3G09050 |
| AT3G12490 | AT3G09260 |
| AT3G12580 | AT3G09580 |
| AT3G12670 | AT3G09600 |
| AT3G12860 | AT3G10160 |
| AT3G13150 | AT3G10525 |
| AT3G13160 | AT3G10720 |
| AT3G13230 | AT3G10740 |
| AT3G13310 | AT3G10940 |
| AT3G13330 | AT3G11090 |
| AT3G13380 | AT3G11230 |
| AT3G13570 | AT3G11620 |
| AT3G13784 | AT3G11700 |
| AT3G13810 | AT3G11750 |
| AT3G13940 | AT3G11840 |
| AT3G14050 | AT3G11930 |
| AT3G14200 | AT3G12110 |
| AT3G14440 | AT3G12150 |
| AT3G14690 | AT3G12560 |
| AT3G14720 | AT3G12580 |
| AT3G14890 | AT3G12610 |
| AT3G15080 | AT3G13000 |
| AT3G15210 | AT3G13030 |
| AT3G15352 | AT3G13062 |
| AT3G15357 | AT3G13750 |
| AT3G15460 | AT3G14240 |
| AT3G15650 | AT3G14620 |
| AT3G15730 | AT3G14770 |
| AT3G16360 | AT3G14920 |
| AT3G16720 | AT3G15450 |
| AT3G16800 | AT3G15630 |
| AT3G16810 | AT3G15760 |
| AT3G16840 | AT3G15770 |
| AT3G17130 | AT3G15780 |
| AT3G17860 | AT3G15840 |
| AT3G17970 | AT3G15950 |
| AT3G18000 | AT3G16150 |
| AT3G18100 | AT3G16190 |
| AT3G18130 | AT3G16220 |

|           |           |
|-----------|-----------|
| AT3G18440 | AT3G16230 |
| AT3G18560 | AT3G16240 |
| AT3G18600 | AT3G16250 |
| AT3G18790 | AT3G16370 |
| AT3G19270 | AT3G16450 |
| AT3G19340 | AT3G16460 |
| AT3G19360 | AT3G16530 |
| AT3G19440 | AT3G16690 |
| AT3G19840 | AT3G16770 |
| AT3G20440 | AT3G16857 |
| AT3G20500 | AT3G16910 |
| AT3G20720 | AT3G16920 |
| AT3G21300 | AT3G17330 |
| AT3G21540 | AT3G17470 |
| AT3G21560 | AT3G17510 |
| AT3G21890 | AT3G18050 |
| AT3G22120 | AT3G18750 |
| AT3G22370 | AT3G19000 |
| AT3G22660 | AT3G19400 |
| AT3G22670 | AT3G19800 |
| AT3G22840 | AT3G19850 |
| AT3G23000 | AT3G21260 |
| AT3G23170 | AT3G21790 |
| AT3G23620 | AT3G22060 |
| AT3G23810 | AT3G22150 |
| AT3G23830 | AT3G22210 |
| AT3G23990 | AT3G22231 |
| AT3G24080 | AT3G22240 |
| AT3G24090 | AT3G22370 |
| AT3G24190 | AT3G22420 |
| AT3G24840 | AT3G22970 |
| AT3G25730 | AT3G23080 |
| AT3G25870 | AT3G23410 |
| AT3G25940 | AT3G23550 |
| AT3G26410 | AT3G23570 |
| AT3G26782 | AT3G23590 |
| AT3G27210 | AT3G23690 |
| AT3G27280 | AT3G23730 |
| AT3G27880 | AT3G23760 |
| AT3G28007 | AT3G23805 |
| AT3G28220 | AT3G23880 |
| AT3G28340 | AT3G24040 |
| AT3G29360 | AT3G24500 |
| AT3G29575 | AT3G25070 |
| AT3G29590 | AT3G25570 |
| AT3G43510 | AT3G25690 |
| AT3G44260 | AT3G25805 |
| AT3G44450 | AT3G26200 |
| AT3G44550 | AT3G26220 |
| AT3G44750 | AT3G26280 |
| AT3G45260 | AT3G26450 |
| AT3G45600 | AT3G26510 |
| AT3G45970 | AT3G26520 |
| AT3G46210 | AT3G26580 |
| AT3G46460 | AT3G26590 |

|           |           |
|-----------|-----------|
| AT3G46620 | AT3G26740 |
| AT3G46970 | AT3G26890 |
| AT3G47080 | AT3G26932 |
| AT3G47420 | AT3G27020 |
| AT3G47480 | AT3G27220 |
| AT3G47500 | AT3G27770 |
| AT3G48100 | AT3G28040 |
| AT3G48250 | AT3G28050 |
| AT3G48510 | AT3G28080 |
| AT3G48700 | AT3G28180 |
| AT3G49180 | AT3G28270 |
| AT3G49220 | AT3G28930 |
| AT3G49240 | AT3G28940 |
| AT3G49320 | AT3G29030 |
| AT3G49990 | AT3G29240 |
| AT3G50260 | AT3G29810 |
| AT3G50380 | AT3G30720 |
| AT3G50760 | AT3G30775 |
| AT3G50960 | AT3G43190 |
| AT3G50970 | AT3G43800 |
| AT3G51240 | AT3G44630 |
| AT3G51660 | AT3G44990 |
| AT3G51800 | AT3G45160 |
| AT3G51870 | AT3G45230 |
| AT3G51895 | AT3G45310 |
| AT3G52040 | AT3G45850 |
| AT3G52180 | AT3G45860 |
| AT3G52190 | AT3G46130 |
| AT3G52800 | AT3G46490 |
| AT3G52870 | AT3G46530 |
| AT3G53230 | AT3G46540 |
| AT3G53260 | AT3G46600 |
| AT3G53620 | AT3G47250 |
| AT3G53940 | AT3G47430 |
| AT3G53990 | AT3G47560 |
| AT3G54030 | AT3G48200 |
| AT3G54400 | AT3G48350 |
| AT3G54820 | AT3G48360 |
| AT3G55120 | AT3G48420 |
| AT3G55430 | AT3G48720 |
| AT3G55510 | AT3G49790 |
| AT3G55580 | AT3G50210 |
| AT3G55620 | AT3G50270 |
| AT3G55760 | AT3G50440 |
| AT3G55940 | AT3G50480 |
| AT3G55980 | AT3G50560 |
| AT3G56070 | AT3G50750 |
| AT3G56090 | AT3G50880 |
| AT3G56880 | AT3G51000 |
| AT3G56990 | AT3G51420 |
| AT3G57000 | AT3G51430 |
| AT3G57010 | AT3G51450 |
| AT3G57150 | AT3G51840 |
| AT3G57240 | AT3G51910 |
| AT3G57490 | AT3G52060 |

|           |           |
|-----------|-----------|
| AT3G57660 | AT3G52290 |
| AT3G57940 | AT3G52360 |
| AT3G58060 | AT3G52720 |
| AT3G58570 | AT3G53180 |
| AT3G58660 | AT3G53190 |
| AT3G58790 | AT3G53280 |
| AT3G59350 | AT3G53420 |
| AT3G59670 | AT3G53470 |
| AT3G59820 | AT3G53950 |
| AT3G60360 | AT3G54260 |
| AT3G60520 | AT3G54480 |
| AT3G60980 | AT3G54720 |
| AT3G61190 | AT3G55260 |
| AT3G61580 | AT3G55630 |
| AT3G61890 | AT3G55960 |
| AT3G62240 | AT3G56060 |
| AT3G62310 | AT3G56160 |
| AT3G62690 | AT3G56360 |
| AT3G62700 | AT3G56400 |
| AT3G62740 | AT3G57190 |
| AT3G63010 | AT3G57330 |
| AT4G00200 | AT3G57410 |
| AT4G00640 | AT3G57470 |
| AT4G01120 | AT3G57790 |
| AT4G01250 | AT3G58120 |
| AT4G01550 | AT3G59090 |
| AT4G01560 | AT3G59940 |
| AT4G01870 | AT3G60130 |
| AT4G02330 | AT3G60340 |
| AT4G02380 | AT3G60690 |
| AT4G02400 | AT3G60910 |
| AT4G02710 | AT3G61060 |
| AT4G02880 | AT3G61210 |
| AT4G03180 | AT3G61260 |
| AT4G03320 | AT3G61430 |
| AT4G03400 | AT3G62010 |
| AT4G03430 | AT3G62330 |
| AT4G04330 | AT3G62370 |
| AT4G04670 | AT3G62410 |
| AT4G04940 | AT3G62860 |
| AT4G05020 | AT3G62930 |
| AT4G05410 | AT3G63080 |
| AT4G05520 | AT3G63210 |
| AT4G09020 | AT4G00750 |
| AT4G09500 | AT4G00780 |
| AT4G09570 | AT4G00880 |
| AT4G10040 | AT4G01330 |
| AT4G10620 | AT4G01460 |
| AT4G11220 | AT4G01510 |
| AT4G11280 | AT4G01897 |
| AT4G11600 | AT4G02050 |
| AT4G12000 | AT4G02290 |
| AT4G12430 | AT4G02540 |
| AT4G12470 | AT4G03060 |
| AT4G12480 | AT4G03070 |



|           |           |
|-----------|-----------|
| AT4G12490 | AT4G03110 |
| AT4G12500 | AT4G03150 |
| AT4G12750 | AT4G04040 |
| AT4G13850 | AT4G04610 |
| AT4G14230 | AT4G04630 |
| AT4G14580 | AT4G04830 |
| AT4G14630 | AT4G04840 |
| AT4G14690 | AT4G04955 |
| AT4G15130 | AT4G08950 |
| AT4G15490 | AT4G09350 |
| AT4G15770 | AT4G09460 |
| AT4G15910 | AT4G10060 |
| AT4G16146 | AT4G10270 |
| AT4G16265 | AT4G10770 |
| AT4G16390 | AT4G11360 |
| AT4G16500 | AT4G11460 |
| AT4G16515 | AT4G11570 |
| AT4G16780 | AT4G11960 |
| AT4G17090 | AT4G12010 |
| AT4G17110 | AT4G12390 |
| AT4G17120 | AT4G12420 |
| AT4G17260 | AT4G12550 |
| AT4G17460 | AT4G12690 |
| AT4G17550 | AT4G12970 |
| AT4G17670 | AT4G13020 |
| AT4G18070 | AT4G13050 |
| AT4G18270 | AT4G13100 |
| AT4G18280 | AT4G13530 |
| AT4G18390 | AT4G13830 |
| AT4G18520 | AT4G14130 |
| AT4G18530 | AT4G14400 |
| AT4G18650 | AT4G14540 |
| AT4G18700 | AT4G14870 |
| AT4G19120 | AT4G14930 |
| AT4G19230 | AT4G15545 |
| AT4G19390 | AT4G15550 |
| AT4G19810 | AT4G15560 |
| AT4G19960 | AT4G15620 |
| AT4G20890 | AT4G15630 |
| AT4G21100 | AT4G15660 |
| AT4G21140 | AT4G15780 |
| AT4G21560 | AT4G15920 |
| AT4G21940 | AT4G16520 |
| AT4G22270 | AT4G16690 |
| AT4G22380 | AT4G16980 |
| AT4G22470 | AT4G17070 |
| AT4G22590 | AT4G17245 |
| AT4G23210 | AT4G17340 |
| AT4G23450 | AT4G17460 |
| AT4G23540 | AT4G17486 |
| AT4G23600 | AT4G17540 |
| AT4G23630 | AT4G17870 |
| AT4G23700 | AT4G18910 |
| AT4G23750 | AT4G18970 |
| AT4G23860 | AT4G19160 |

|           |           |
|-----------|-----------|
| AT4G23920 | AT4G19170 |
| AT4G23990 | AT4G19420 |
| AT4G24220 | AT4G19430 |
| AT4G24570 | AT4G19530 |
| AT4G24960 | AT4G19660 |
| AT4G25320 | AT4G19670 |
| AT4G25340 | AT4G19860 |
| AT4G25470 | AT4G19880 |
| AT4G25480 | AT4G19985 |
| AT4G25500 | AT4G20110 |
| AT4G25620 | AT4G21810 |
| AT4G25630 | AT4G21850 |
| AT4G25640 | AT4G21870 |
| AT4G25660 | AT4G22200 |
| AT4G25730 | AT4G22212 |
| AT4G25990 | AT4G22490 |
| AT4G26080 | AT4G22540 |
| AT4G26150 | AT4G22570 |
| AT4G26370 | AT4G22753 |
| AT4G26600 | AT4G22756 |
| AT4G26670 | AT4G22890 |
| AT4G26780 | AT4G23180 |
| AT4G27280 | AT4G23260 |
| AT4G27380 | AT4G23300 |
| AT4G27410 | AT4G23400 |
| AT4G27520 | AT4G23670 |
| AT4G27620 | AT4G23680 |
| AT4G27652 | AT4G24350 |
| AT4G27657 | AT4G24660 |
| AT4G27720 | AT4G24700 |
| AT4G27820 | AT4G24780 |
| AT4G27830 | AT4G24810 |
| AT4G27940 | AT4G25080 |
| AT4G27970 | AT4G25260 |
| AT4G28200 | AT4G25700 |
| AT4G28320 | AT4G25780 |
| AT4G28330 | AT4G25830 |
| AT4G28450 | AT4G25940 |
| AT4G28720 | AT4G26320 |
| AT4G29190 | AT4G26520 |
| AT4G29510 | AT4G26530 |
| AT4G29690 | AT4G26555 |
| AT4G29780 | AT4G26790 |
| AT4G30290 | AT4G27030 |
| AT4G30350 | AT4G27300 |
| AT4G30650 | AT4G27450 |
| AT4G30720 | AT4G27710 |
| AT4G30830 | AT4G28080 |
| AT4G30840 | AT4G28250 |
| AT4G30935 | AT4G28270 |
| AT4G30990 | AT4G28290 |
| AT4G31140 | AT4G29220 |
| AT4G31790 | AT4G29890 |
| AT4G32020 | AT4G30450 |
| AT4G32190 | AT4G30610 |

|           |           |
|-----------|-----------|
| AT4G32400 | AT4G30690 |
| AT4G33070 | AT4G30993 |
| AT4G33400 | AT4G31500 |
| AT4G33905 | AT4G32570 |
| AT4G33920 | AT4G32710 |
| AT4G33980 | AT4G32980 |
| AT4G34120 | AT4G33000 |
| AT4G34230 | AT4G33050 |
| AT4G34590 | AT4G33150 |
| AT4G34650 | AT4G33420 |
| AT4G34710 | AT4G33500 |
| AT4G34740 | AT4G33660 |
| AT4G34910 | AT4G33666 |
| AT4G34990 | AT4G33960 |
| AT4G35300 | AT4G34030 |
| AT4G35310 | AT4G34160 |
| AT4G35320 | AT4G34220 |
| AT4G35510 | AT4G34590 |
| AT4G35730 | AT4G34630 |
| AT4G35940 | AT4G34760 |
| AT4G36010 | AT4G35090 |
| AT4G36020 | AT4G35350 |
| AT4G36580 | AT4G35440 |
| AT4G36680 | AT4G35600 |
| AT4G37090 | AT4G35750 |
| AT4G37320 | AT4G35770 |
| AT4G38050 | AT4G36540 |
| AT4G38100 | AT4G37080 |
| AT4G38150 | AT4G37240 |
| AT4G38380 | AT4G37300 |
| AT4G38400 | AT4G37310 |
| AT4G38440 | AT4G37410 |
| AT4G38580 | AT4G37450 |
| AT4G38710 | AT4G37550 |
| AT4G38890 | AT4G37560 |
| AT4G39210 | AT4G37610 |
| AT4G39260 | AT4G37800 |
| AT4G39670 | AT4G37980 |
| AT4G39730 | AT4G38060 |
| AT4G39800 | AT4G38690 |
| AT4G40000 | AT4G38840 |
| AT5G01290 | AT4G38850 |
| AT5G01340 | AT4G38860 |
| AT5G01520 | AT4G39510 |
| AT5G01850 | AT4G39640 |
| AT5G01880 | AT4G39675 |
| AT5G02050 | AT4G39710 |
| AT5G02490 | AT4G39770 |
| AT5G02590 | AT4G39900 |
| AT5G02810 | AT4G39940 |
| AT5G02820 | AT4G39950 |
| AT5G02860 | AT5G01015 |
| AT5G03350 | AT5G01090 |
| AT5G04170 | AT5G01920 |
| AT5G04250 | AT5G02230 |

|           |           |
|-----------|-----------|
| AT5G04280 | AT5G02560 |
| AT5G04340 | AT5G02710 |
| AT5G04940 | AT5G02760 |
| AT5G05210 | AT5G02940 |
| AT5G05410 | AT5G03350 |
| AT5G06000 | AT5G03380 |
| AT5G06110 | AT5G04040 |
| AT5G06320 | AT5G04080 |
| AT5G06460 | AT5G04140 |
| AT5G06550 | AT5G04490 |
| AT5G06710 | AT5G04530 |
| AT5G06760 | AT5G04810 |
| AT5G06980 | AT5G05250 |
| AT5G07010 | AT5G05440 |
| AT5G07340 | AT5G05690 |
| AT5G07920 | AT5G05800 |
| AT5G07990 | AT5G06265 |
| AT5G08180 | AT5G06280 |
| AT5G08260 | AT5G06870 |
| AT5G08400 | AT5G07240 |
| AT5G08610 | AT5G07580 |
| AT5G08620 | AT5G07860 |
| AT5G08640 | AT5G08330 |
| AT5G09420 | AT5G08350 |
| AT5G09510 | AT5G10320 |
| AT5G09590 | AT5G11070 |
| AT5G09840 | AT5G12110 |
| AT5G10630 | AT5G12200 |
| AT5G10790 | AT5G12900 |
| AT5G11070 | AT5G13090 |
| AT5G11110 | AT5G13140 |
| AT5G11150 | AT5G13730 |
| AT5G11240 | AT5G13770 |
| AT5G11590 | AT5G13980 |
| AT5G12050 | AT5G14120 |
| AT5G12140 | AT5G14450 |
| AT5G12220 | AT5G14740 |
| AT5G13200 | AT5G14880 |
| AT5G13750 | AT5G15120 |
| AT5G14050 | AT5G15210 |
| AT5G14520 | AT5G15350 |
| AT5G14550 | AT5G15530 |
| AT5G14580 | AT5G15600 |
| AT5G14600 | AT5G15830 |
| AT5G14640 | AT5G16030 |
| AT5G14760 | AT5G16180 |
| AT5G14920 | AT5G16400 |
| AT5G14940 | AT5G16590 |
| AT5G15190 | AT5G16650 |
| AT5G15490 | AT5G16940 |
| AT5G15550 | AT5G17880 |
| AT5G15640 | AT5G18100 |
| AT5G15750 | AT5G18140 |
| AT5G15810 | AT5G18170 |
| AT5G15850 | AT5G18600 |

|           |           |
|-----------|-----------|
| AT5G15950 | AT5G18630 |
| AT5G16010 | AT5G18650 |
| AT5G16040 | AT5G18670 |
| AT5G16200 | AT5G18850 |
| AT5G16380 | AT5G19120 |
| AT5G16750 | AT5G19290 |
| AT5G16930 | AT5G19590 |
| AT5G17030 | AT5G19860 |
| AT5G17040 | AT5G20250 |
| AT5G17050 | AT5G21100 |
| AT5G17190 | AT5G21170 |
| AT5G17210 | AT5G22270 |
| AT5G17220 | AT5G22510 |
| AT5G17270 | AT5G22850 |
| AT5G17460 | AT5G22920 |
| AT5G17760 | AT5G23340 |
| AT5G17850 | AT5G23830 |
| AT5G17860 | AT5G23860 |
| AT5G18400 | AT5G23920 |
| AT5G18440 | AT5G24120 |
| AT5G18470 | AT5G24150 |
| AT5G18525 | AT5G24160 |
| AT5G18550 | AT5G24165 |
| AT5G18820 | AT5G24210 |
| AT5G19260 | AT5G24420 |
| AT5G19750 | AT5G24490 |
| AT5G19820 | AT5G24800 |
| AT5G19875 | AT5G24870 |
| AT5G19890 | AT5G25190 |
| AT5G20160 | AT5G25280 |
| AT5G20180 | AT5G25630 |
| AT5G20230 | AT5G25770 |
| AT5G20600 | AT5G26260 |
| AT5G20790 | AT5G26280 |
| AT5G20830 | AT5G26600 |
| AT5G20910 | AT5G26820 |
| AT5G22060 | AT5G27350 |
| AT5G22290 | AT5G27360 |
| AT5G22320 | AT5G27400 |
| AT5G22330 | AT5G27710 |
| AT5G22570 | AT5G27950 |
| AT5G22740 | AT5G28020 |
| AT5G22840 | AT5G28770 |
| AT5G23220 | AT5G34850 |
| AT5G23300 | AT5G35170 |
| AT5G23720 | AT5G35490 |
| AT5G23850 | AT5G35630 |
| AT5G24470 | AT5G35750 |
| AT5G24570 | AT5G35790 |
| AT5G24840 | AT5G36170 |
| AT5G25110 | AT5G37930 |
| AT5G26230 | AT5G37990 |
| AT5G26340 | AT5G38140 |
| AT5G26770 | AT5G38980 |
| AT5G26920 | AT5G39080 |

|           |           |
|-----------|-----------|
| AT5G27520 | AT5G40380 |
| AT5G27930 | AT5G40450 |
| AT5G28150 | AT5G40500 |
| AT5G35735 | AT5G40850 |
| AT5G36910 | AT5G40890 |
| AT5G37260 | AT5G40910 |
| AT5G37500 | AT5G41700 |
| AT5G37550 | AT5G42750 |
| AT5G37600 | AT5G42760 |
| AT5G38720 | AT5G42850 |
| AT5G38890 | AT5G43070 |
| AT5G39410 | AT5G43270 |
| AT5G39580 | AT5G43700 |
| AT5G39610 | AT5G43850 |
| AT5G39840 | AT5G44020 |
| AT5G40390 | AT5G44060 |
| AT5G40590 | AT5G44420 |
| AT5G41190 | AT5G44520 |
| AT5G41460 | AT5G44680 |
| AT5G41670 | AT5G45250 |
| AT5G42150 | AT5G45380 |
| AT5G42420 | AT5G45480 |
| AT5G42570 | AT5G45670 |
| AT5G42900 | AT5G46180 |
| AT5G43150 | AT5G46690 |
| AT5G43260 | AT5G46780 |
| AT5G43860 | AT5G46790 |
| AT5G44110 | AT5G47240 |
| AT5G44670 | AT5G47450 |
| AT5G44730 | AT5G47910 |
| AT5G44930 | AT5G48490 |
| AT5G45070 | AT5G49360 |
| AT5G45340 | AT5G49450 |
| AT5G45750 | AT5G49760 |
| AT5G46330 | AT5G51890 |
| AT5G46710 | AT5G51970 |
| AT5G47060 | AT5G52100 |
| AT5G47120 | AT5G52190 |
| AT5G47220 | AT5G52640 |
| AT5G47230 | AT5G52780 |
| AT5G47370 | AT5G53020 |
| AT5G47400 | AT5G53160 |
| AT5G47410 | AT5G53170 |
| AT5G47455 | AT5G53200 |
| AT5G47630 | AT5G53250 |
| AT5G47650 | AT5G53880 |
| AT5G47880 | AT5G54250 |
| AT5G48070 | AT5G54380 |
| AT5G48250 | AT5G54610 |
| AT5G48480 | AT5G54940 |
| AT5G48540 | AT5G54980 |
| AT5G48880 | AT5G55120 |
| AT5G49280 | AT5G55300 |
| AT5G49330 | AT5G56100 |
| AT5G49480 | AT5G56260 |

|           |           |
|-----------|-----------|
| AT5G49560 | AT5G56850 |
| AT5G49900 | AT5G56870 |
| AT5G50315 | AT5G57040 |
| AT5G50720 | AT5G57170 |
| AT5G50800 | AT5G57345 |
| AT5G50840 | AT5G57780 |
| AT5G51130 | AT5G57785 |
| AT5G51180 | AT5G57900 |
| AT5G51570 | AT5G58120 |
| AT5G51710 | AT5G58260 |
| AT5G51830 | AT5G58310 |
| AT5G52310 | AT5G58350 |
| AT5G52380 | AT5G58375 |
| AT5G52580 | AT5G58770 |
| AT5G52660 | AT5G58787 |
| AT5G52820 | AT5G59080 |
| AT5G53590 | AT5G59090 |
| AT5G53870 | AT5G59670 |
| AT5G53970 | AT5G59780 |
| AT5G54470 | AT5G59960 |
| AT5G54490 | AT5G60360 |
| AT5G54910 | AT5G60400 |
| AT5G54960 | AT5G60490 |
| AT5G55180 | AT5G61160 |
| AT5G55200 | AT5G61340 |
| AT5G55400 | AT5G61420 |
| AT5G55450 | AT5G61440 |
| AT5G55920 | AT5G61590 |
| AT5G55990 | AT5G62340 |
| AT5G56030 | AT5G62650 |
| AT5G56080 | AT5G62930 |
| AT5G56350 | AT5G63180 |
| AT5G56630 | AT5G63190 |
| AT5G57050 | AT5G63480 |
| AT5G57110 | AT5G63800 |
| AT5G57120 | AT5G64240 |
| AT5G57280 | AT5G64370 |
| AT5G57530 | AT5G64380 |
| AT5G57540 | AT5G64410 |
| AT5G57660 | AT5G64920 |
| AT5G57760 | AT5G65010 |
| AT5G57990 | AT5G65110 |
| AT5G58070 | AT5G65380 |
| AT5G58370 | AT5G65730 |
| AT5G58600 | AT5G65760 |
| AT5G58620 | AT5G66490 |
| AT5G58660 | AT5G66520 |
| AT5G58670 | AT5G66880 |
| AT5G58690 | AT5G67070 |
| AT5G58700 | AT5G67150 |
| AT5G59180 | AT5G67290 |
| AT5G59240 | AT5G67420 |
| AT5G59480 |           |
| AT5G59820 |           |
| AT5G59950 |           |

AT5G60030  
AT5G60680  
AT5G60730  
AT5G60790  
AT5G60990  
AT5G61020  
AT5G61030  
AT5G61370  
AT5G61380  
AT5G61600  
AT5G61660  
AT5G61770  
AT5G61810  
AT5G61820  
AT5G62150  
AT5G62190  
AT5G62210  
AT5G62280  
AT5G62350  
AT5G62360  
AT5G62430  
AT5G62440  
AT5G62920  
AT5G63120  
AT5G63130  
AT5G63140  
AT5G63320  
AT5G63330  
AT5G63770  
AT5G63790  
AT5G63810  
AT5G63990  
AT5G64080  
AT5G64170  
AT5G64230  
AT5G64260  
AT5G64310  
AT5G64420  
AT5G64680  
AT5G65280  
AT5G65300  
AT5G65860  
AT5G65900  
AT5G66460  
AT5G66540  
AT5G67240  
AT5G67480  
AT5G67630  
ATCG00170  
ATCG00180  
ATCG00190  
ATCG00490  
ATCG00680



**Table S5.** *A. thaliana* up-regulated CBF regulon genes

| atg       | Short_description                                             |
|-----------|---------------------------------------------------------------|
| AT1G01420 | UGT72B3 (UDP-GLUCOSYL TRANSFERASE 72B3)                       |
| AT1G01470 | LEA14 (LATE EMBRYOGENESIS ABUNDANT 14)                        |
| AT1G02820 | late embryogenesis abundant 3 family protein / LEA3           |
| AT1G04240 | SHY2 (SHORT HYPOCOTYL 2)                                      |
| AT1G05170 | galactosyltransferase family protein                          |
| AT1G06780 | GAUT6 (Galacturonosyltransferase 6)                           |
| AT1G08920 | sugar transporter, putative                                   |
| AT1G09350 | AtGolS3 (Arabidopsis thaliana galactinol synthase 3)          |
| AT1G10090 | unknown protein                                               |
| AT1G10370 | ERD9 (EARLY-RESPONSIVE TO DEHYDRATION 9)                      |
| AT1G10410 | Protein of unknown function DUF1336                           |
| AT1G10760 | SEX1 (STARCH EXCESS 1)                                        |
| AT1G11210 | unknown protein                                               |
| AT1G14580 | zinc finger (C2H2 type) family protein                        |
| AT1G16850 | unknown protein                                               |
| AT1G20440 | COR47 (COLD-REGULATED 47)                                     |
| AT1G20450 | ERD10 (EARLY RESPONSIVE TO DEHYDRATION 10)                    |
| AT1G21460 | nodulin MtN3 family protein                                   |
| AT1G21790 | unknown protein                                               |
| AT1G27200 | unknown protein                                               |
| AT1G27760 | interferon-related developmental regulator family protein     |
| AT1G27910 | PUB45 (PLANT U-BOX 45)                                        |
| AT1G27920 | MAP65-8 (MICROTUBULE-ASSOCIATED PROTEIN 65-8)                 |
| AT1G29395 | COR414-TM1                                                    |
| AT1G30360 | ERD4 (early-responsive to dehydration 4)                      |
| AT1G32860 | glycosyl hydrolase family 17 protein                          |
| AT1G33230 | unknown protein                                               |
| AT1G43890 | ATRAP18 (ARABIDOPSIS RAB GTPASE HOMOLOG B18)                  |
| AT1G47710 | serpin, putative / serine protease inhibitor, putative        |
| AT1G48100 | glycoside hydrolase family 28 protein                         |
| AT1G51090 | heavy-metal-associated domain-containing protein              |
| AT1G51700 | ADOF1                                                         |
| AT1G53035 | unknown protein                                               |
| AT1G58360 | AAP1 (AMINO ACID PERMEASE 1)                                  |
| AT1G60470 | AtGolS4 (Arabidopsis thaliana galactinol synthase 4)          |
| AT1G62570 | FMO GS-OX4 (FLAVIN-MONOOXYGENASE GLUCOSINOLATE S-OXYGENASE 4) |
| AT1G64890 | integral membrane transporter family protein                  |
| AT1G67310 | calmodulin binding / transcription regulator                  |
| AT1G67360 | rubber elongation factor (REF) family protein                 |
| AT1G67850 | unknown protein                                               |
| AT1G68500 | unknown protein                                               |
| AT1G68570 | proton-dependent oligopeptide transport (POT) family protein  |
| AT1G69870 | proton-dependent oligopeptide transport (POT) family protein  |
| AT1G70900 | unknown protein                                               |
| AT1G73480 | hydrolase, alpha/beta fold family protein                     |
| AT1G75390 | AtbZIP44 (Arabidopsis thaliana basic leucine-zipper 44)       |
| AT1G76580 | transcription factor                                          |

AT1G76590 zinc-binding family protein  
AT1G77120 ADH1 (ALCOHOL DEHYDROGENASE 1)  
AT1G78070 unknown protein  
AT1G79660 unknown protein  
AT1G80130 binding  
AT2G15320 leucine-rich repeat family protein  
AT2G15970 COR413-PM1  
AT2G16700 ADF5 (ACTIN DEPOLYMERIZING FACTOR 5)  
AT2G16890 UDP-glucuronosyl/UDP-glucosyl transferase family protein  
AT2G16990 tetracycline transporter  
AT2G17840 ERD7 (EARLY-RESPONSIVE TO DEHYDRATION 7)  
AT2G22080 unknown protein  
AT2G22590 transferase, transferring glycosyl groups  
AT2G22860 ATPSK2 (PHYTOSULFOKINE 2 PRECURSOR)  
AT2G23120 unknown protein  
AT2G23340 AP2 domain-containing transcription factor, putative  
AT2G27830 unknown protein  
AT2G28900 ATOEP16-1 (OUTER PLASTID ENVELOPE PROTEIN 16-1)  
AT2G32430 galactosyltransferase family protein  
AT2G33380 RD20 (RESPONSIVE TO DESSICATION 20)  
AT2G34850 MEE25 (maternal effect embryo arrest 25)  
AT2G35960 NHL12  
AT2G40460 proton-dependent oligopeptide transport (POT) family protein  
AT2G40880 ATCYSA (CYSTATIN A); cysteine-type endopeptidase inhibitor  
AT2G41190 amino acid transporter family protein  
AT2G42530 COR15B (COLD REGULATED 15B)  
AT2G42540 COR15A (COLD-REGULATED 15A)  
AT2G43620 chitinase, putative  
AT2G47180 AtGolS1 (Arabidopsis thaliana galactinol synthase 1)  
AT2G47890 zinc finger (B-box type) family protein  
AT3G03640 BGLU25 (BETA GLUCOSIDASE 25)  
AT3G05660 AtRLP33 (Receptor Like Protein 33)  
AT3G05880 RCI2A (RARE-COLD-INDUCIBLE 2A)  
AT3G09540 pectate lyase family protein  
AT3G11670 DGD1 (DIGALACTOSYL DIACYLGLYCEROL DEFICIENT 1)  
AT3G12580 HSP70 (heat shock protein 70)  
AT3G14890 phosphoesterase  
AT3G17130 invertase/pectin methylesterase inhibitor family protein  
AT3G22840 ELIP1 (EARLY LIGHT-INDUCABLE PROTEIN)  
AT3G23000 CIPK7 (CBL-INTERACTING PROTEIN KINASE 7)  
AT3G25870 unknown protein  
AT3G27210 unknown protein  
AT3G28220 meprin and TRAF homology domain-containing protein  
AT3G45260 zinc finger (C2H2 type) family protein  
AT3G45600 TET3 (TETRASPANIN3)  
AT3G50260 CEJ1 (COOPERATIVELY REGULATED BY ETHYLENE AND JASMONATE 1)  
AT3G50960 PLP3a (Phosducin-like protein 3 homolog)  
AT3G50970 LT130 (LOW TEMPERATURE-INDUCED 30)  
AT3G53990 universal stress protein (USP) family protein  
AT3G54030 protein kinase family protein

AT3G54400 aspartyl protease family protein  
AT3G55580 regulator of chromosome condensation (RCC1) family protein  
AT3G55760 unknown protein  
AT3G55940 phosphoinositide-specific phospholipase C, putative  
AT3G60520 unknown protein  
AT3G62700 ATMRP10; ATPase, coupled to transmembrane movement of substances  
AT3G62740 BGLU7 (BETA GLUCOSIDASE 7)  
AT4G02330 ATPMEPCRB; pectinesterase  
AT4G12000 unknown protein  
AT4G12470 protease inhibitor/seed storage/lipid transfer protein (LTP) family protein  
AT4G12480 pEARLI 1  
AT4G15130 unknown protein  
AT4G16500 cysteine protease inhibitor family protein  
AT4G17090 CT-BMY (CHLOROPLAST BETA-AMYLASE)  
AT4G17550 transporter-related  
AT4G18270 ATTRANS11; P-P-bond-hydrolysis-driven protein transmembrane transporter  
AT4G23450 zinc finger (C3HC4-type RING finger) family protein  
AT4G23600 COR13 (CORONATINE INDUCED 1)  
AT4G23630 BTI1 (VIRB2-INTERACTING PROTEIN 1)  
AT4G23920 UGE2 (UDP-D-glucose/UDP-D-galactose 4-epimerase 2)  
AT4G24220 VEP1 (VEIN PATTERNING 1)  
AT4G24960 ATHVA22D  
AT4G25470 CBF2 (C-REPEAT/DRE BINDING FACTOR 2)  
AT4G27410 RD26 (RESPONSIVE TO DESICCATION 26)  
AT4G27520 plastocyanin-like domain-containing protein  
AT4G27830 BGLU10 (BETA GLUCOSIDASE 10)  
AT4G29190 zinc finger (CCCH-type) family protein  
AT4G30650 hydrophobic protein, putative  
AT4G30830 unknown protein  
AT4G32190 centromeric protein-related  
AT4G34230 ATCAD5 (CINNAMYL ALCOHOL DEHYDROGENASE 5)  
AT4G34650 SQS2 (SQUALENE SYNTHASE 2)  
AT4G34990 AtMYB32 (myb domain protein 32)  
AT4G36010 pathogenesis-related thaumatin family protein  
AT4G37320 CYP81D5  
AT4G38400 ATEXLA2 (ARABIDOPSIS THALIANA EXPANSIN-LIKE A2)  
AT4G38580 AFTP6 (FARNESYLATED PROTEIN 6)  
AT5G01520 zinc finger (C3HC4-type RING finger) family protein  
AT5G04250 OTU-like cysteine protease family protein  
AT5G04340 ZAT6 (ZINC FINGER OF ARABIDOPSIS THALIANA 6)  
AT5G11110 ATSPS2F (SUCROSE PHOSPHATE SYNTHASE 2F)  
AT5G12140 ATCYS1 (A. thaliana cystatin-1)  
AT5G13200 GRAM domain-containing protein / ABA-responsive protein-related  
AT5G13750 ZIFL1 (ZINC INDUCED FACILITATOR-like 1)  
AT5G14760 AO (L-ASPARTATE OXIDASE)  
AT5G17760 AAA-type ATPase family protein  
AT5G17850 cation exchanger, putative (CAX8)  
AT5G19875 unknown protein  
AT5G20830 SUS1 (SUCROSE SYNTHASE 1)  
AT5G23850 unknown protein

AT5G24570 unknown protein  
AT5G25110 CIPK25 (CBL-INTERACTING PROTEIN KINASE 25)  
AT5G26770 unknown protein  
AT5G27930 protein phosphatase 2C, putative / PP2C, putative  
AT5G28150 unknown protein  
AT5G37500 GORK (GATED OUTWARDLY-RECTIFYING K+ CHANNEL)  
AT5G42570 unknown protein  
AT5G46710 zinc-binding family protein  
AT5G47650 ATNUDT2 (ARABIDOPSIS THALIANA NUDIX HYDROLASE HOMOLOG 2)  
AT5G50720 ATHVA22E  
AT5G50800 nodulin MtN3 family protein  
AT5G52310 LTI78 (LOW-TEMPERATURE-INDUCED 78)  
AT5G52660 myb family transcription factor  
AT5G55450 protease inhibitor/seed storage/lipid transfer protein (LTP) family protein  
AT5G57110 ACA8 (AUTOINHIBITED CA2+ -ATPASE, ISOFORM 8)  
AT5G58670 PLC1 (PHOSPHOLIPASE C 1); phospholipase C  
AT5G58700 phosphoinositide-specific phospholipase C family protein  
AT5G61810 mitochondrial substrate carrier family protein  
AT5G62350 DC 1.2 homolog (FL5-2I22)  
AT5G62360 invertase/pectin methylesterase inhibitor family protein  
AT5G64260 EXL2 (EXORDIUM LIKE 2)  
ATCG00490 unknown protein

---

**Table S6.** *A. thaliana* down-regulated genes CBF regulon genes

| atg       | Description                                                  |
|-----------|--------------------------------------------------------------|
| AT1G01120 | KCS1 (3-KETOACYL-COA SYNTHASE 1)                             |
| AT1G03870 | FLA9 (FASCICLIN-LIKE ARABINOOGALACTAN 9)                     |
| AT1G12080 | unknown protein                                              |
| AT1G19670 | ATCLH1 (ARABIDOPSIS THALIANA CORONATINE-INDUCED PROTEIN 1)   |
| AT1G21270 | WAK2                                                         |
| AT1G25275 | unknown protein                                              |
| AT1G31580 | ECS1                                                         |
| AT1G52190 | proton-dependent oligopeptide transport (POT) family protein |
| AT1G69530 | ATEXPA1 (ARABIDOPSIS THALIANA EXPANSIN A1)                   |
| AT1G72430 | auxin-responsive protein-related                             |
| AT1G73600 | methyltransferase/ phosphoethanolamine N-methyltransferase   |
| AT1G74670 | gibberellin-responsive protein, putative                     |
| AT2G05540 | glycine-rich protein                                         |
| AT2G22330 | CYP79B3                                                      |
| AT2G26020 | PDF1.2b (plant defensin 1.2b)                                |
| AT2G27420 | cysteine proteinase, putative                                |
| AT2G28630 | KCS12 (3-KETOACYL-COA SYNTHASE 12)                           |
| AT2G31110 | unknown protein                                              |
| AT2G38310 | unknown protein                                              |
| AT2G39310 | JAL22 (JACALIN-RELATED LECTIN 22)                            |
| AT2G41090 | calmodulin-like calcium-binding protein, 22 kDa (CaBP-22)    |
| AT2G41100 | TCH3 (TOUCH 3); calcium ion binding                          |
| AT3G04210 | disease resistance protein (TIR-NBS class), putative         |
| AT3G11930 | universal stress protein (USP) family protein                |
| AT3G13750 | BGAL1 (Beta galactosidase 1)                                 |
| AT3G16240 | DELTA-TIP                                                    |
| AT3G16530 | legume lectin family protein                                 |
| AT3G22231 | PCC1 (PATHOGEN AND CIRCADIAN CONTROLLED 1)                   |
| AT3G29030 | EXPA5 (EXPANSIN A5)                                          |
| AT3G30775 | ERD5 (EARLY RESPONSIVE TO DEHYDRATION 5)                     |
| AT3G46490 | oxidoreductase                                               |
| AT3G48720 | transferase family protein                                   |
| AT3G52720 | ACA1 (ALPHA CARBONIC ANHYDRASE 1)                            |
| AT3G56060 | glucose-methanol-choline (GMC) oxidoreductase family protein |
| AT3G56400 | WRKY70                                                       |
| AT3G58120 | BZIP61                                                       |
| AT4G11460 | protein kinase family protein                                |
| AT4G12550 | AIR1                                                         |
| AT4G14400 | ACD6 (ACCELERATED CELL DEATH 6)                              |
| AT4G15550 | IAGLU (INDOLE-3-ACETATE BETA-D-GLUCOSYLTRANSFERASE)          |
| AT4G19420 | pectinacetylesterase family protein                          |
| AT4G19430 | unknown protein                                              |
| AT4G27300 | S-locus protein kinase, putative                             |
| AT4G31500 | CYP83B1 (CYTOCHROME P450 MONOOXYGENASE 83B1)                 |
| AT4G33050 | EDA39 (embryo sac development arrest 39)                     |
| AT4G33666 | unknown protein                                              |
| AT4G37450 | AGP18 (ARABINOOGALACTAN PROTEIN 18)                          |

AT4G39640 GGT1 (GAMMA-GLUTAMYL TRANSPEPTIDASE 1)  
AT5G01015 unknown protein  
AT5G14120 nodulin family protein  
AT5G20250 DIN10 (DARK INDUCIBLE 10)  
AT5G22270 unknown protein  
AT5G24210 lipase class 3 family protein  
AT5G40450 unknown protein  
AT5G44420 PDF1.2  
AT5G49360 BXL1 (BETA-XYLOSIDASE 1)  
AT5G56870 BGAL4 (beta-galactosidase 4)  
AT5G61160 AACT1 (anthocyanin 5-aromatic acyltransferase 1)

---
